# Supplementary material
Source: HighWire-hosted journal article supplement (https://bmjophth.bmj.com/content/3/1/e000130)
Supplement: inline-supplementary-material-1 [file inline-supplementary-material-1.docx]

**Supplemental Table.** Median Central Retinal Thickness (interquartile range) of the right eyes and left eyes at baseline and at 12-months post initiation of SGLT2 inhibitor.

|  | Baseline | Post 12 months | *P*-Value |
| --- | --- | --- | --- |
| CRT (μm) of  Right Eyes (n=5) | 416  (334-511) | 311  (293-330) | *P*= 0.043 |
| CRT (μm) of  Left Eyes (n=5) | 542  (490-559) | 356  (348-356) | *P*= 0.043 |

CRT: Central Retinal Thickness

The *P*-value was calculated via the Wilcoxon signed-ranks test.
